# Supplementary material
Source: PubMed Central journal article supplement (PMC6794160)

# Kugeratski et al. Figure S1

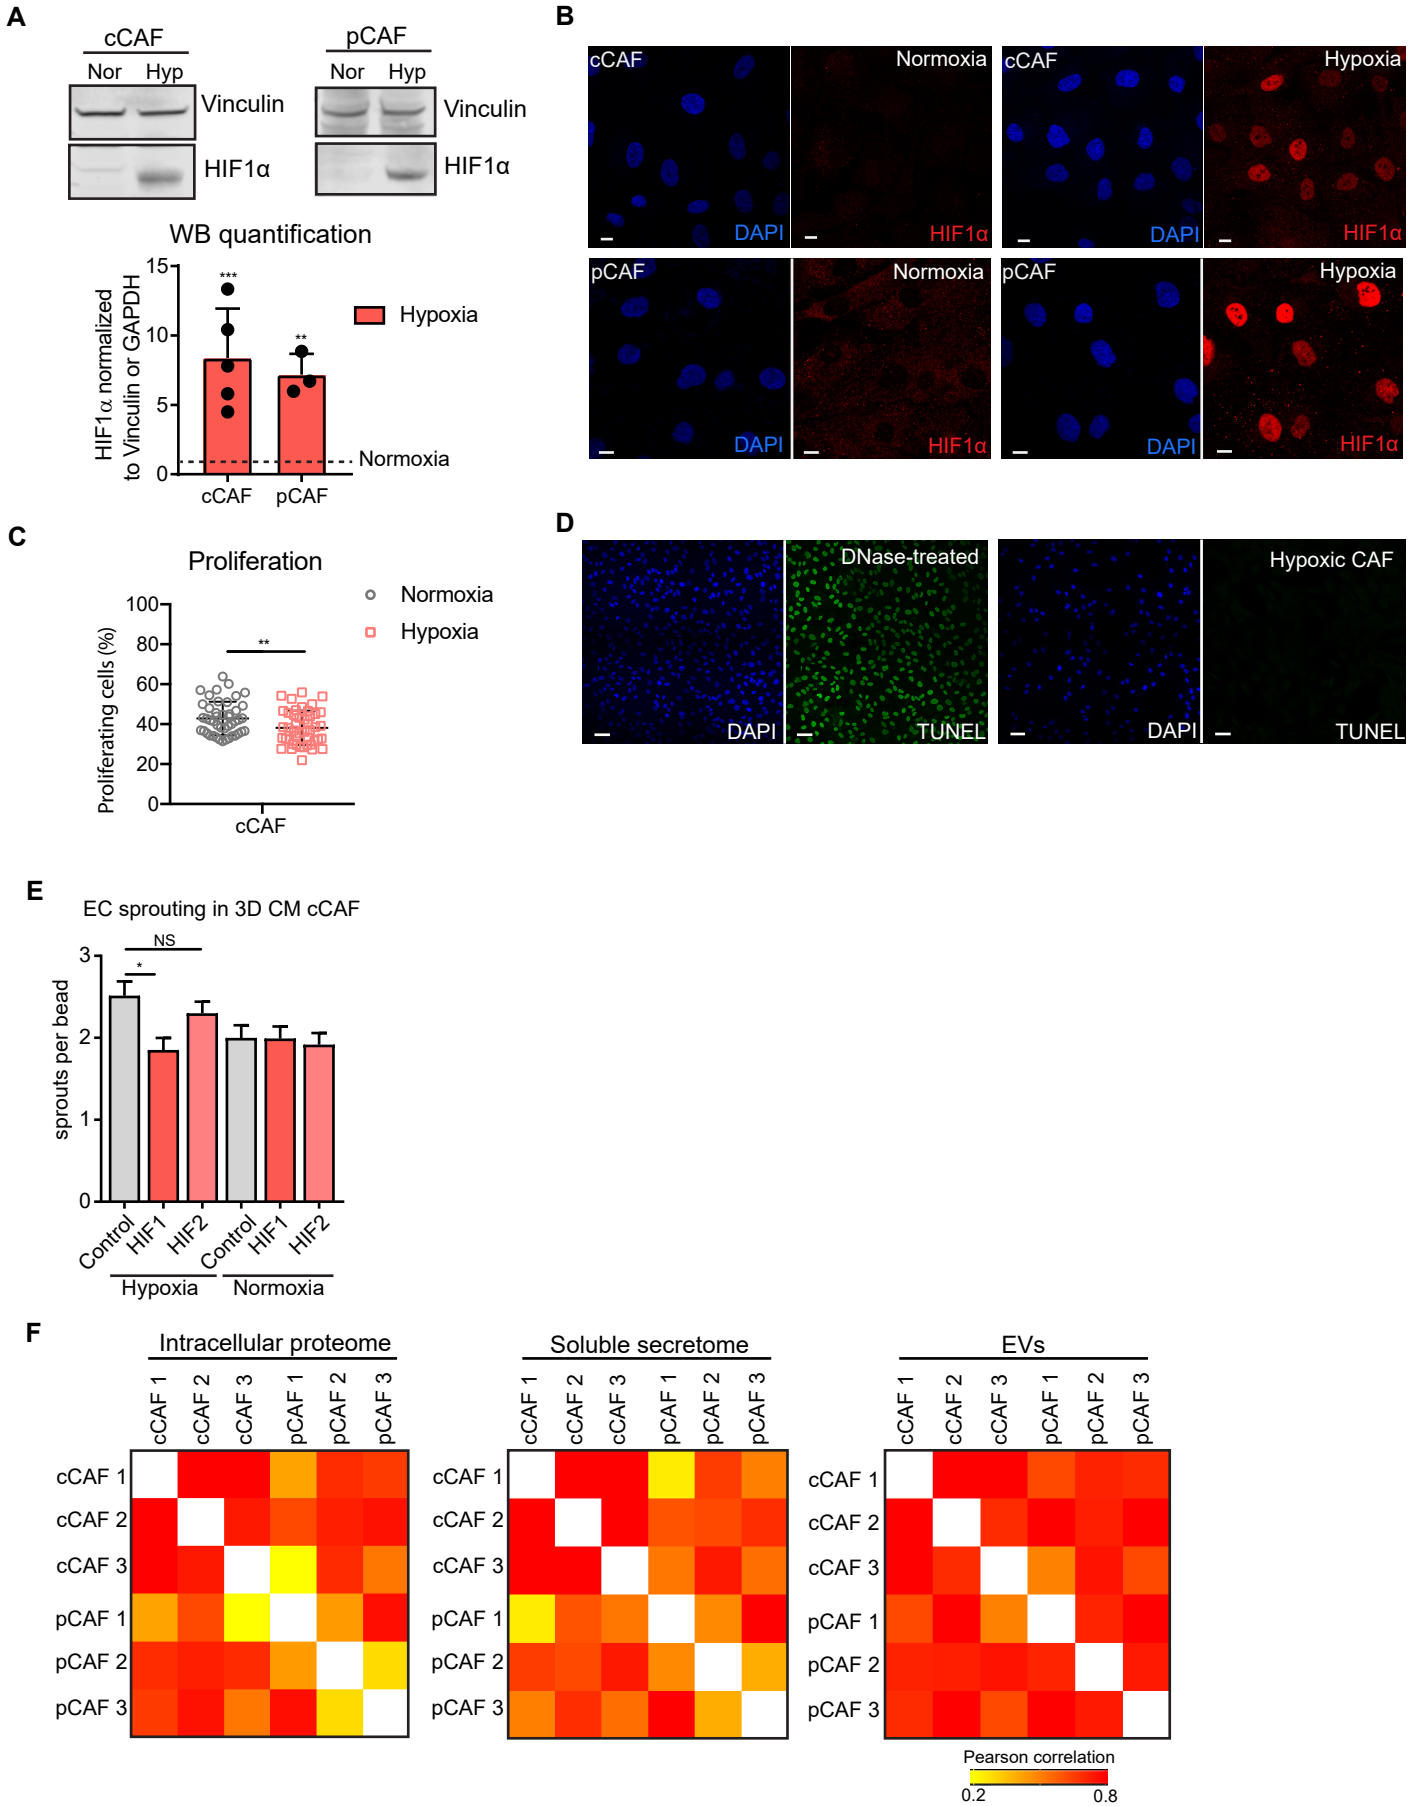

Supplement: EMS84571-supplement-Figure_S1.pdf [file EMS84571-supplement-Figure_S1.pdf]

Kugeratski et al. Figure S2

A

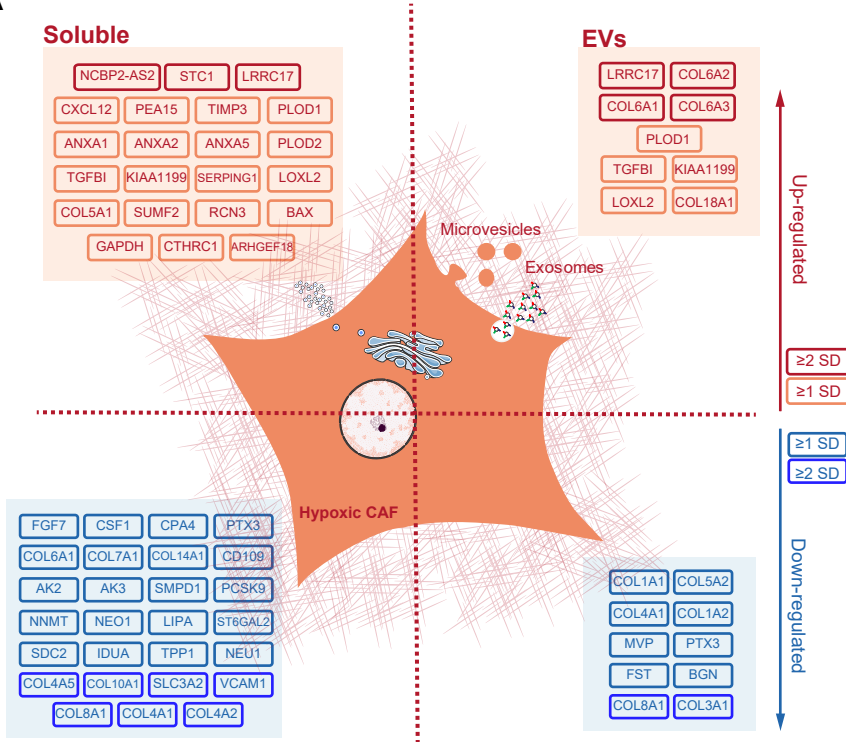

B

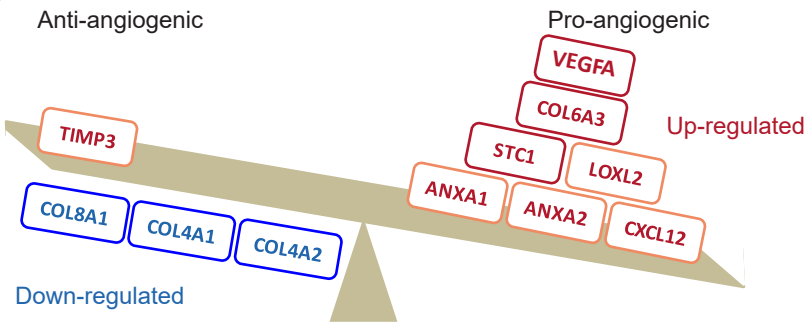

C

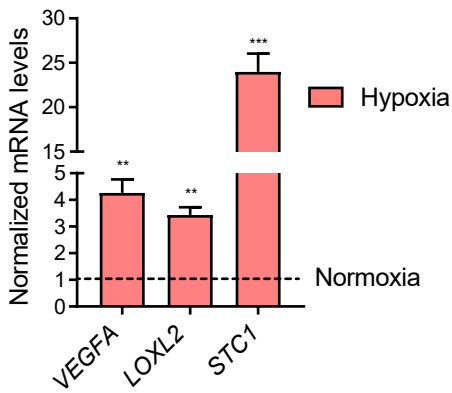

Supplement: EMS84571-supplement-Figure_S2.pdf [file EMS84571-supplement-Figure_S2.pdf]

A

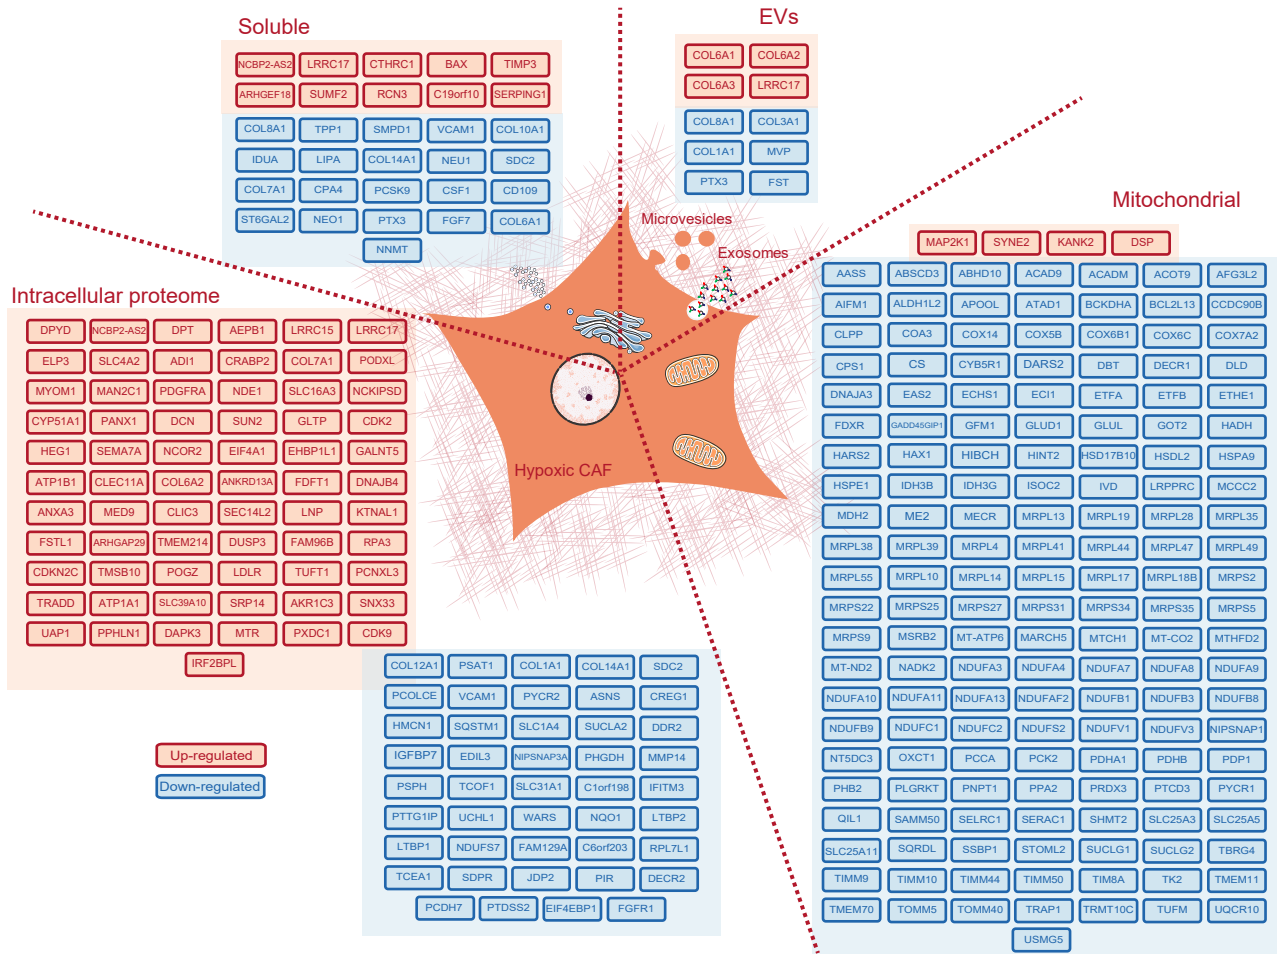

B

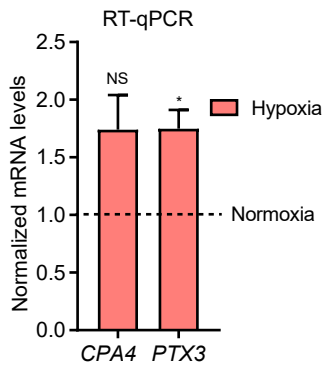

C

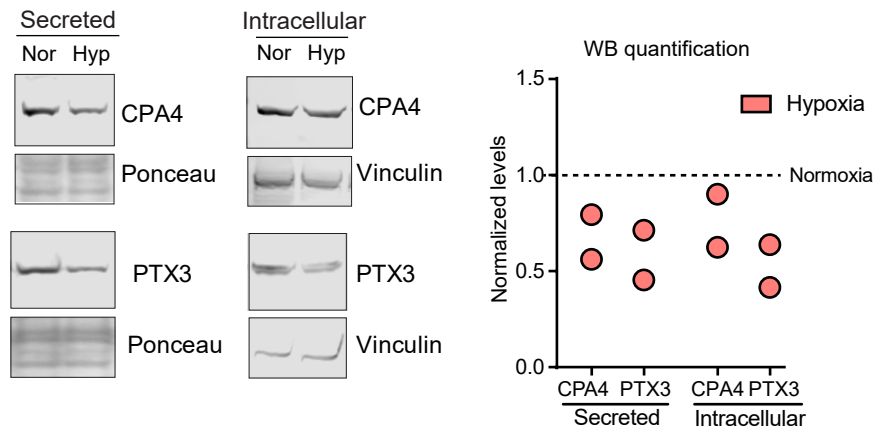

Supplement: EMS84571-supplement-Figure_S3.pdf [file EMS84571-supplement-Figure_S3.pdf]

# Kugeratski et al. Figure S4

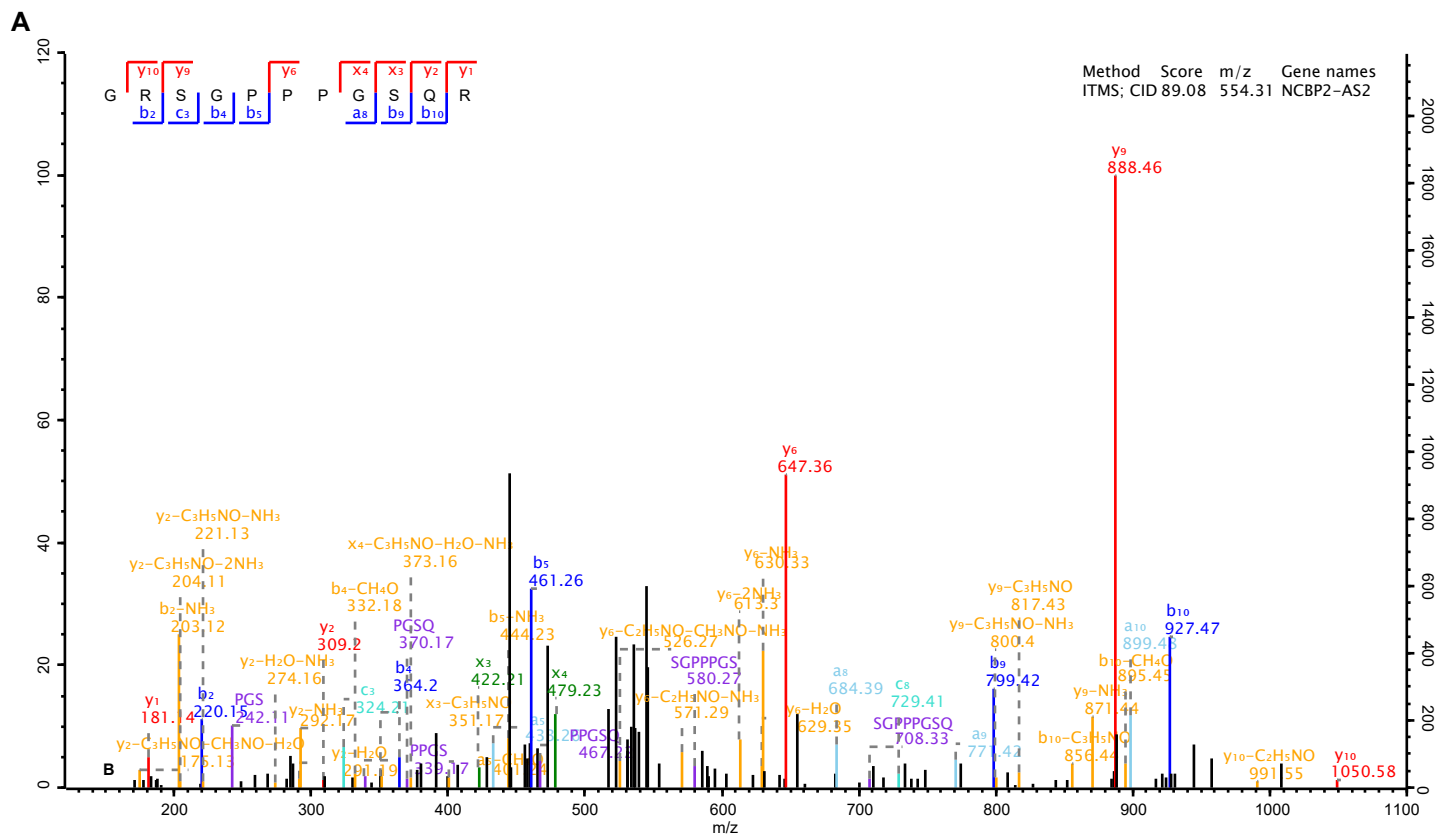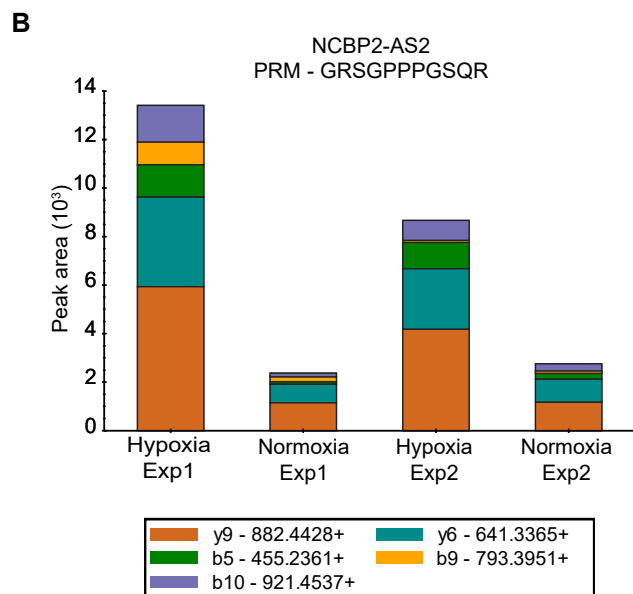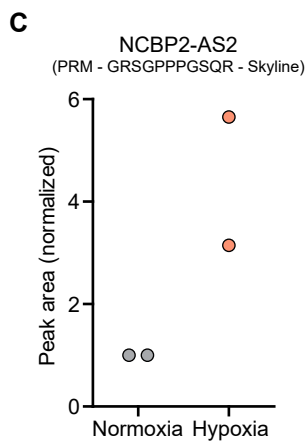

Supplement: EMS84571-supplement-Figure_S4.pdf [file EMS84571-supplement-Figure_S4.pdf]

# Kugeratski et al. Figure S5

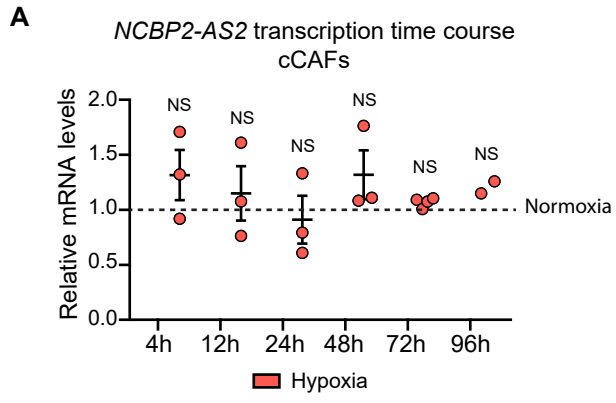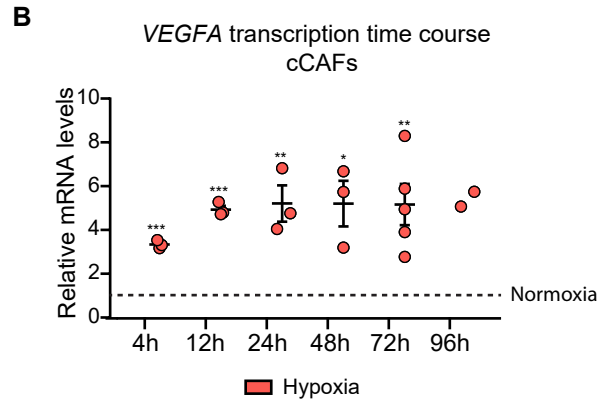

Supplement: EMS84571-supplement-Figure_S5.pdf [file EMS84571-supplement-Figure_S5.pdf]

# Kugeratski et al. Figure S6

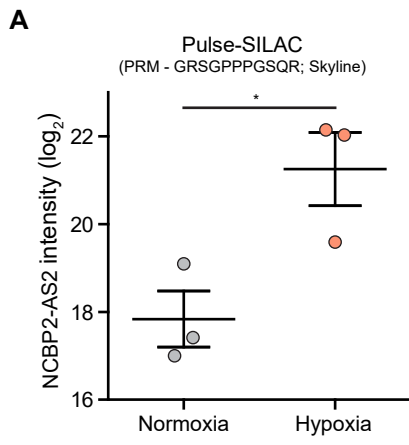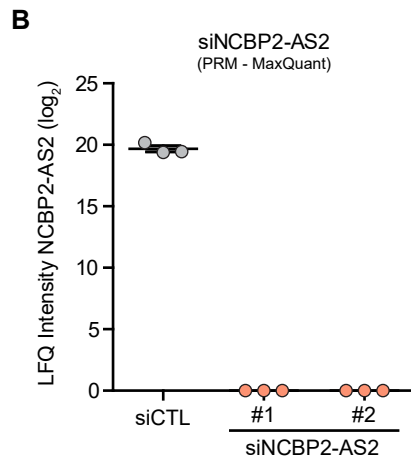

Supplement: EMS84571-supplement-Figure_S6.pdf [file EMS84571-supplement-Figure_S6.pdf]

Kugeratski et al. Figure S7

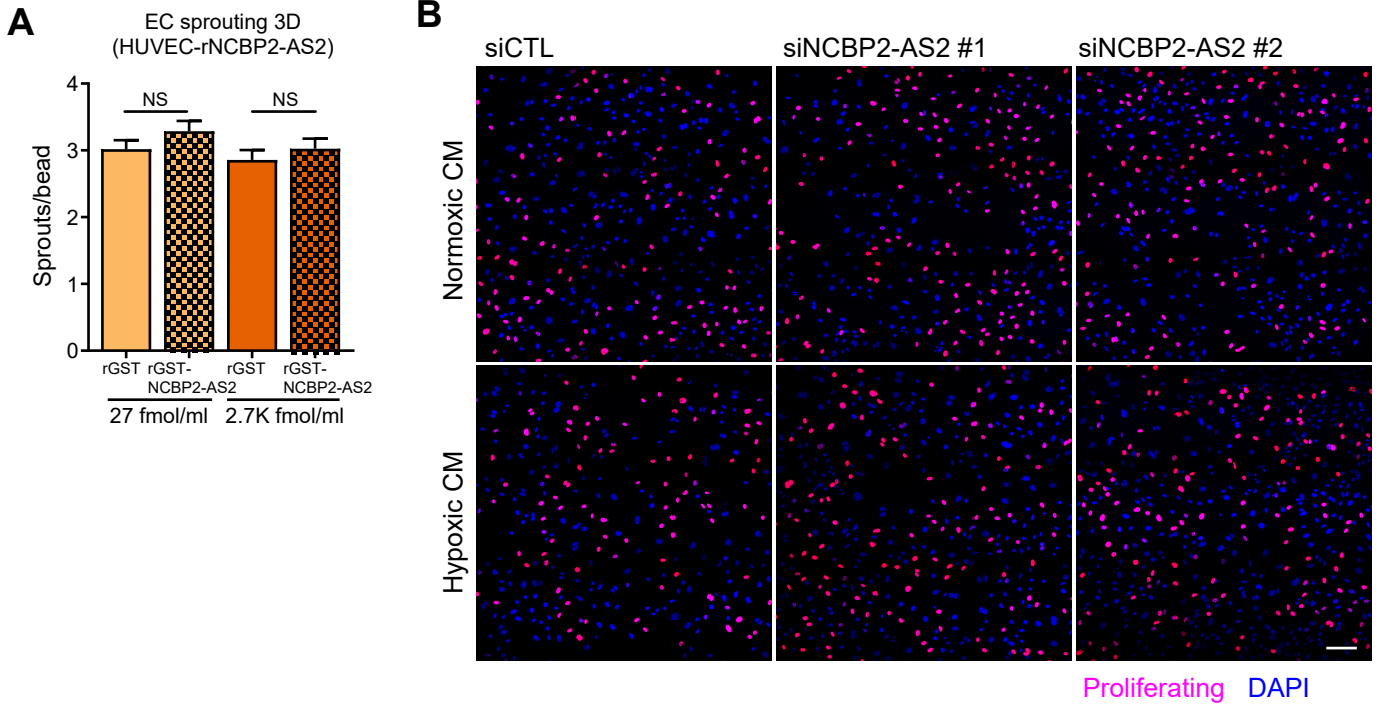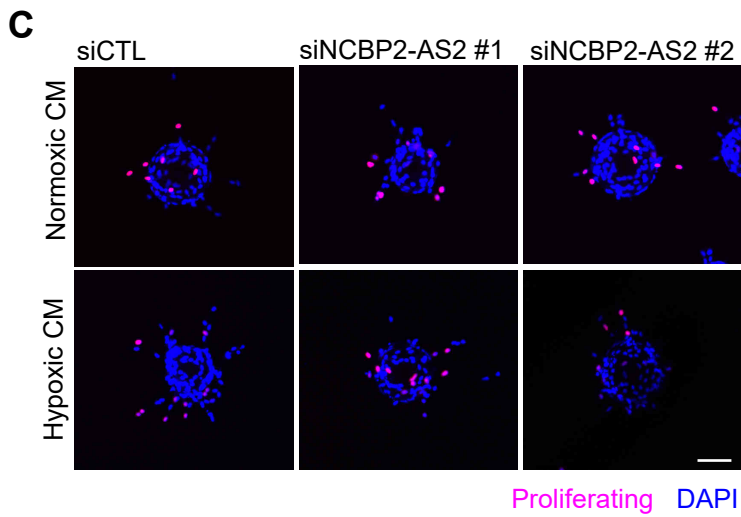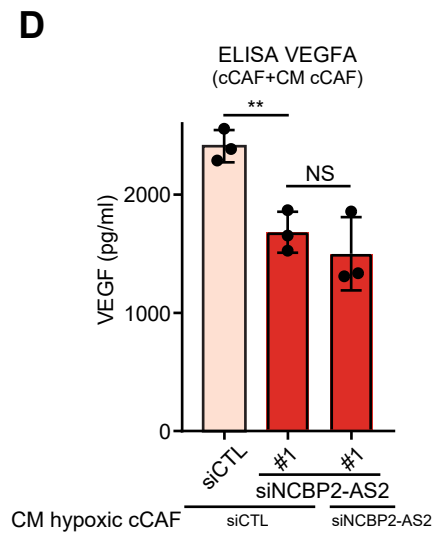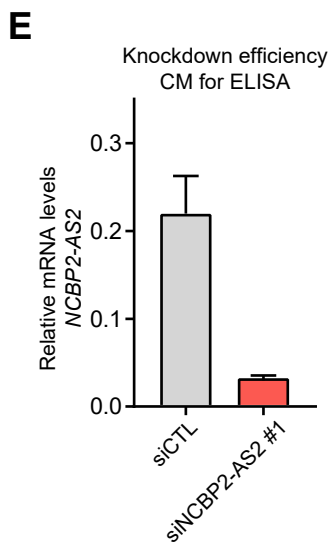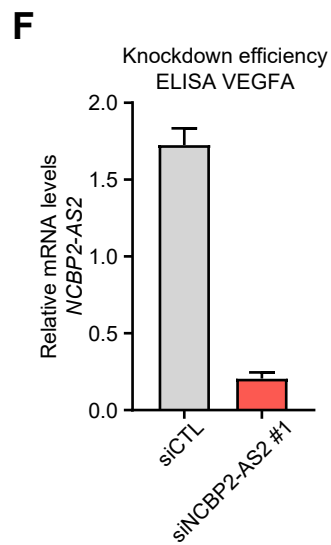

Supplement: EMS84571-supplement-Figure_S7.pdf [file EMS84571-supplement-Figure_S7.pdf]

Kugeratski et al. Figure S8

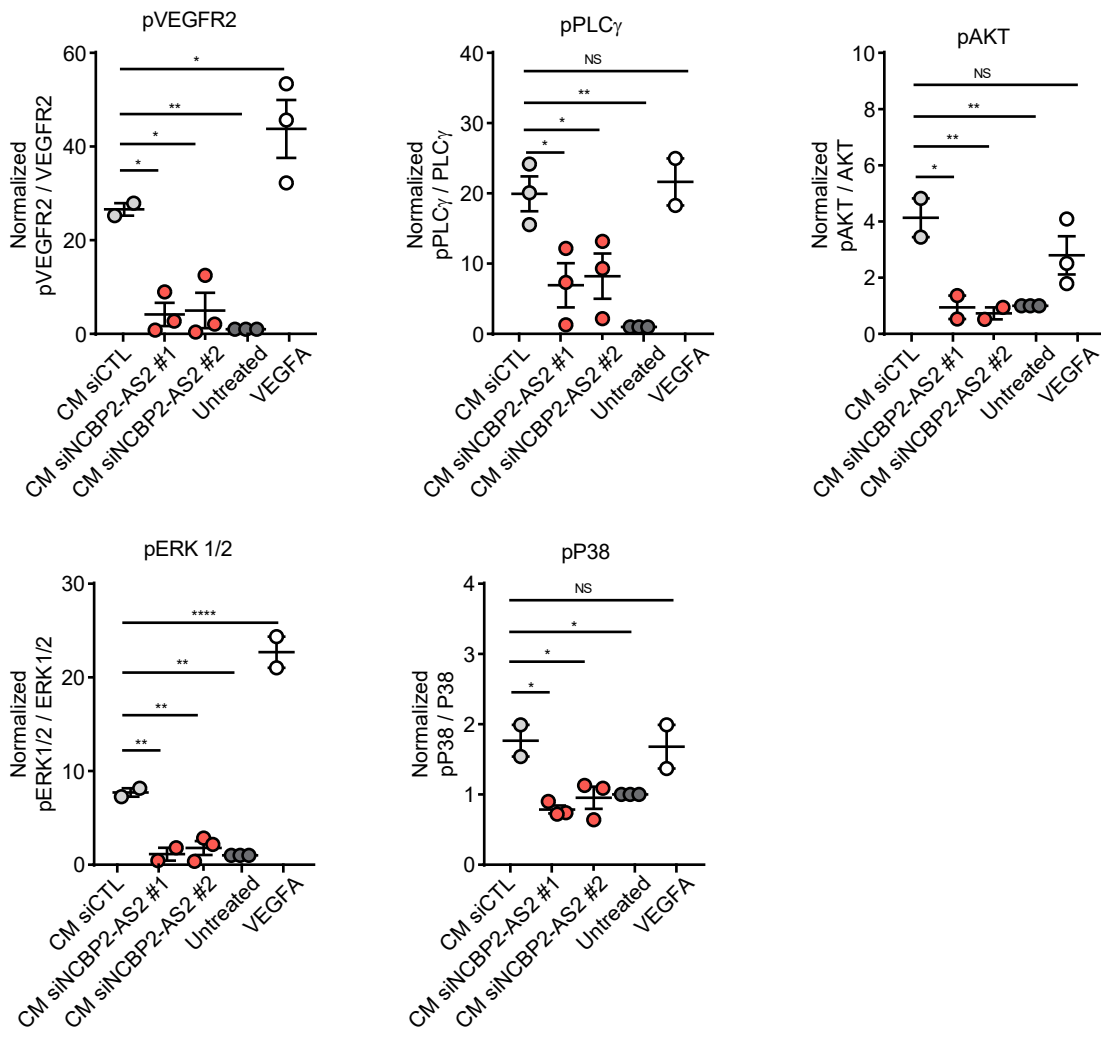

Supplement: EMS84571-supplement-Figure_S8.pdf [file EMS84571-supplement-Figure_S8.pdf]

# Kugeratski et al. Figure S9

Cluster Hypoxia downregulated Cluster Hypoxia upregulated

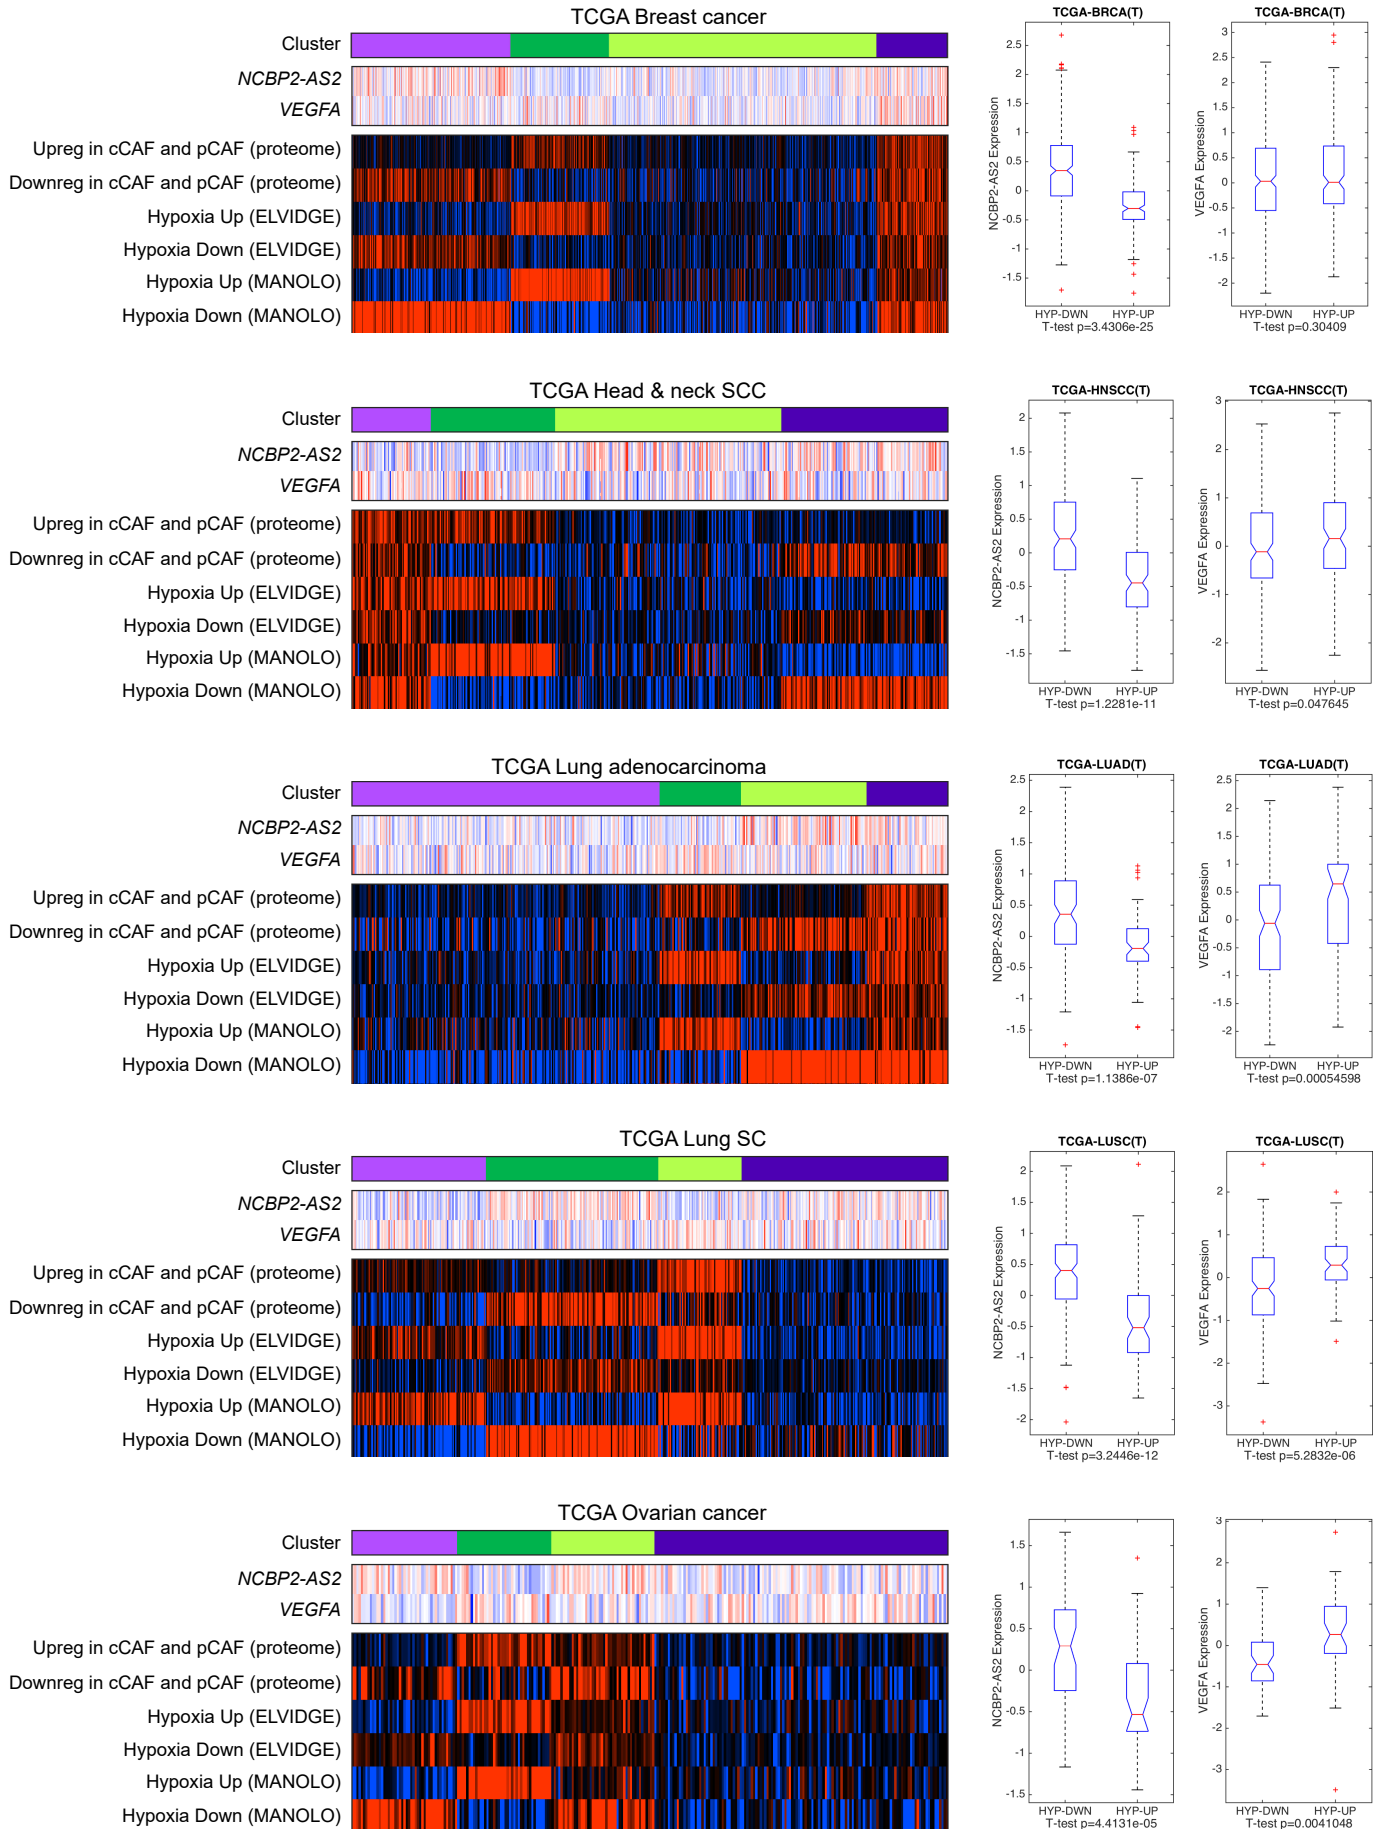

Supplement: EMS84571-supplement-Figure_S9.pdf [file EMS84571-supplement-Figure_S9.pdf]
